# Supplementary material
Source: publisher figshare collection journal article supplement (https://acs.figshare.com/ndownloader/files/5161051)
Supplement: Supplementary file 1 [file 5161051]

 
data_last 
 
_audit_creation_method            SHELXL-97 
_chemical_name_systematic 
; 
 ? 
; 
_chemical_name_common             ? 
_chemical_melting_point           ? 
_chemical_formula_moiety          ? 
_chemical_formula_sum 
 'C26 H17 N3 O4' 
_chemical_formula_weight          435.43 
 
loop_ 
 _atom_type_symbol 
 _atom_type_description 
 _atom_type_scat_dispersion_real 
 _atom_type_scat_dispersion_imag 
 _atom_type_scat_source 
 'C'  'C'   0.0033   0.0016 
 'International Tables Vol C Tables 4.2.6.8 and 6.1.1.4' 
 'H'  'H'   0.0000   0.0000 
 'International Tables Vol C Tables 4.2.6.8 and 6.1.1.4' 
 'N'  'N'   0.0061   0.0033 
 'International Tables Vol C Tables 4.2.6.8 and 6.1.1.4' 
 'O'  'O'   0.0106   0.0060 
 'International Tables Vol C Tables 4.2.6.8 and 6.1.1.4' 
 
_symmetry_cell_setting            'Triclinic' 
_symmetry_space_group_name_H-M    'P-1' 
 
loop_ 
 _symmetry_equiv_pos_as_xyz 
 'x, y, z' 
 '-x, -y, -z' 
 
_cell_length_a                    9.7993(2) 
_cell_length_b                    11.1782(2) 
_cell_length_c                    11.5440(3) 
_cell_angle_alpha                 65.8541(9) 
_cell_angle_beta                  66.0412(9) 
_cell_angle_gamma                 84.3268(9) 
_cell_volume                      1051.02(4) 
_cell_formula_units_Z             2 
_cell_measurement_temperature     293(2) 
_cell_measurement_reflns_used     11962
_cell_measurement_theta_min        3.395
_cell_measurement_theta_max        27.485
 
_exptl_crystal_description        'column' 
_exptl_crystal_colour             'yellow' 
_exptl_crystal_size_max           0.30 
_exptl_crystal_size_mid           0.15 
_exptl_crystal_size_min           0.14 
_exptl_crystal_density_meas       ? 
_exptl_crystal_density_diffrn     1.376 
_exptl_crystal_density_method     'not measured' 
_exptl_crystal_F_000              452 
_exptl_absorpt_coefficient_mu     0.095 
_exptl_absorpt_correction_type    empirical
_exptl_absorpt_correction_T_min   0.933 
_exptl_absorpt_correction_T_max   0.989 
_exptl_absorpt_process_details    '(Blessing, 1995, 1997)' 
 
_exptl_special_details 
; 
 ? 
; 
 
_diffrn_ambient_temperature       293(2) 
_diffrn_radiation_wavelength      0.71073 
_diffrn_radiation_type            MoK\a 
_diffrn_radiation_source          'fine-focus sealed tube' 
_diffrn_radiation_monochromator   graphite 
_diffrn_measurement_device_type   'NONIUS KappaCCD' 
_diffrn_measurement_method        'CCD' 
_diffrn_detector_area_resol_mean  0.76 
_diffrn_standards_number          ? 
_diffrn_standards_interval_count  ? 
_diffrn_standards_interval_time   ? 
_diffrn_standards_decay_%         ? 
_diffrn_reflns_number             20212 
_diffrn_reflns_av_R_equivalents   0.0639 
_diffrn_reflns_av_sigmaI/netI     0.0646 
_diffrn_reflns_limit_h_min        -12 
_diffrn_reflns_limit_h_max        12 
_diffrn_reflns_limit_k_min        -14 
_diffrn_reflns_limit_k_max        14 
_diffrn_reflns_limit_l_min        -14 
_diffrn_reflns_limit_l_max        14 
_diffrn_reflns_theta_min          3.45 
_diffrn_reflns_theta_max          27.44 
_reflns_number_total              4782 
_reflns_number_gt                 2830 
_reflns_threshold_expression      >2sigma(I) 
 
_computing_data_collection        'KappaCCD (Nonius B. V., 1998)' 
_computing_cell_refinement        'HKL Scalepack (Otwinowski & Minor, 1997)' 
_computing_data_reduction
'HKL Denzo (Otwinowski & Minor, 1997) & maXus (Mackay et al., 1998)'
_computing_structure_solution     'SHELXS-97 (Sheldrick, 1997)' 
_computing_structure_refinement   'SHELXL-97 (Sheldrick, 1997)' 
_computing_molecular_graphics     'Bruker SHELXTL V5.1 (Sheldrick, 1998)' 
_computing_publication_material   'SHELXL-97 (Sheldrick, 1997)' 
 
_refine_special_details 
; 
 Refinement of F^2^ against ALL reflections.  The weighted R-factor wR and 
 goodness of fit S are based on F^2^, conventional R-factors R are based 
 on F, with F set to zero for negative F^2^. The threshold expression of 
 F^2^ > 2sigma(F^2^) is used only for calculating R-factors(gt) etc. and is 
 not relevant to the choice of reflections for refinement.  R-factors based 
 on F^2^ are statistically about twice as large as those based on F, and R- 
 factors based on ALL data will be even larger. 
; 
 
_refine_ls_structure_factor_coef  Fsqd  
_refine_ls_matrix_type            full 
_refine_ls_weighting_scheme       calc  
_refine_ls_weighting_details 
 'calc w=1/[\s^2^(Fo^2^)+(0.0600P)^2^+0.0000P] where P=(Fo^2^+2Fc^2^)/3' 
_atom_sites_solution_primary      direct 
_atom_sites_solution_secondary    difmap 
_atom_sites_solution_hydrogens    geom 
_refine_ls_hydrogen_treatment     mixed 
_refine_ls_extinction_method      SHELXL 
_refine_ls_extinction_coef        0.026(4) 
_refine_ls_extinction_expression 
 'Fc^*^=kFc[1+0.001xFc^2^\l^3^/sin(2\q)]^-1/4^' 
_refine_ls_number_reflns          4782 
_refine_ls_number_parameters      299 
_refine_ls_number_restraints      0 
_refine_ls_R_factor_all           0.0879 
_refine_ls_R_factor_gt            0.0418 
_refine_ls_wR_factor_ref          0.1111 
_refine_ls_wR_factor_gt           0.1000 
_refine_ls_goodness_of_fit_ref    0.985 
_refine_ls_restrained_S_all       0.985 
_refine_ls_shift/su_max           0.001 
_refine_ls_shift/su_mean          0.000 
 
loop_ 
 _atom_site_label 
 _atom_site_type_symbol 
 _atom_site_fract_x 
 _atom_site_fract_y 
 _atom_site_fract_z 
 _atom_site_U_iso_or_equiv 
 _atom_site_adp_type 
 _atom_site_occupancy 
 _atom_site_symmetry_multiplicity 
 _atom_site_calc_flag 
 _atom_site_refinement_flags 
 _atom_site_disorder_assembly 
 _atom_site_disorder_group 
O1 O 0.21629(14) 0.44189(12) 0.61193(13) 0.0714(4) Uani 1 1 d . . . 
O2 O 0.29199(13) 0.02027(10) 0.65263(11) 0.0639(3) Uani 1 1 d . . . 
O3 O 0.98852(14) 0.16294(14) -0.41577(14) 0.0808(4) Uani 1 1 d . . . 
O4 O 0.48078(14) 0.12675(14) -0.20875(14) 0.0804(4) Uani 1 1 d . . . 
N1 N 0.71320(13) 0.42741(10) 0.04168(11) 0.0433(3) Uani 1 1 d . . . 
N2 N 0.28824(13) 0.24427(11) 0.59536(11) 0.0443(3) Uani 1 1 d . . . 
N3 N 0.73646(13) 0.16184(12) -0.28801(13) 0.0487(3) Uani 1 1 d . . . 
C1 C 0.60569(15) 0.37839(12) 0.18199(14) 0.0390(3) Uani 1 1 d . . . 
C2 C 0.47324(15) 0.30805(13) 0.22358(15) 0.0427(3) Uani 1 1 d . . . 
H2A H 0.4544 0.2899 0.1594 0.051 Uiso 1 1 calc R . . 
C3 C 0.36906(16) 0.26464(13) 0.35898(14) 0.0426(3) Uani 1 1 d . . . 
H3A H 0.2805 0.2176 0.3857 0.051 Uiso 1 1 calc R . . 
C4 C 0.39615(15) 0.29087(13) 0.45457(14) 0.0406(3) Uani 1 1 d . . . 
C5 C 0.52734(16) 0.36132(14) 0.41488(15) 0.0463(4) Uani 1 1 d . . . 
H5A H 0.5452 0.3799 0.4792 0.056 Uiso 1 1 calc R . . 
C6 C 0.63189(16) 0.40404(13) 0.27947(14) 0.0451(4) Uani 1 1 d . . . 
H6A H 0.7207 0.4504 0.2533 0.054 Uiso 1 1 calc R . . 
C7 C 0.20702(17) 0.32309(17) 0.66268(16) 0.0520(4) Uani 1 1 d . . . 
C8 C 0.11045(18) 0.23149(18) 0.80482(16) 0.0614(5) Uani 1 1 d . . . 
H8A H 0.0446 0.2559 0.8748 0.074 Uiso 1 1 calc R . . 
C9 C 0.13297(19) 0.11030(18) 0.81600(16) 0.0614(4) Uani 1 1 d . . . 
H9A H 0.0856 0.0350 0.8955 0.074 Uiso 1 1 calc R . . 
C10 C 0.24506(17) 0.11202(16) 0.68292(15) 0.0491(4) Uani 1 1 d . . . 
C11 C 0.72732(15) 0.36046(12) -0.04337(14) 0.0400(3) Uani 1 1 d . . . 
C12 C 0.71036(16) 0.22365(13) 0.01218(15) 0.0452(4) Uani 1 1 d . . . 
H12A H 0.6965 0.1755 0.1041 0.054 Uiso 1 1 calc R . . 
C13 C 0.71396(16) 0.15897(14) -0.06854(15) 0.0475(4) Uani 1 1 d . . . 
H13A H 0.6991 0.0677 -0.0297 0.057 Uiso 1 1 calc R . . 
C14 C 0.73934(16) 0.22877(14) -0.20608(15) 0.0443(4) Uani 1 1 d . . . 
C15 C 0.76299(17) 0.36374(14) -0.26387(16) 0.0507(4) Uani 1 1 d . . . 
H15A H 0.7829 0.4111 -0.3574 0.061 Uiso 1 1 calc R . . 
C16 C 0.75713(17) 0.42870(13) -0.18337(15) 0.0477(4) Uani 1 1 d . . . 
H16A H 0.7734 0.5199 -0.2234 0.057 Uiso 1 1 calc R . . 
C17 C 0.85987(19) 0.13716(16) -0.38835(17) 0.0540(4) Uani 1 1 d . . . 
C18 C 0.79949(19) 0.07299(16) -0.44889(17) 0.0574(4) Uani 1 1 d . . . 
H18A H 0.8566 0.0442 -0.5180 0.069 Uiso 1 1 calc R . . 
C19 C 0.65340(19) 0.06300(15) -0.39015(17) 0.0574(4) Uani 1 1 d . . . 
H19A H 0.5898 0.0270 -0.4114 0.069 Uiso 1 1 calc R . . 
C20 C 0.60562(19) 0.11812(15) -0.28447(17) 0.0530(4) Uani 1 1 d . . . 
C21 C 0.77784(16) 0.55979(13) -0.02067(14) 0.0416(3) Uani 1 1 d . . . 
C22 C 0.69282(18) 0.65804(14) 0.01045(16) 0.0483(4) Uani 1 1 d . . . 
H22A H 0.5934 0.6377 0.0737 0.058 Uiso 1 1 calc R . . 
C23 C 0.7552(2) 0.78536(15) -0.05199(17) 0.0600(4) Uani 1 1 d . . . 
H23A H 0.6973 0.8507 -0.0312 0.072 Uiso 1 1 calc R . . 
C24 C 0.9021(2) 0.81668(16) -0.14458(19) 0.0675(5) Uani 1 1 d . . . 
H24A H 0.9434 0.9030 -0.1868 0.081 Uiso 1 1 calc R . . 
C25 C 0.9880(2) 0.71966(17) -0.17471(18) 0.0662(5) Uani 1 1 d . . . 
H25A H 1.0878 0.7404 -0.2370 0.079 Uiso 1 1 calc R . . 
C26 C 0.92598(18) 0.59125(15) -0.11244(17) 0.0556(4) Uani 1 1 d . . . 
H26A H 0.9846 0.5259 -0.1327 0.067 Uiso 1 1 calc R . . 
 
loop_ 
 _atom_site_aniso_label 
 _atom_site_aniso_U_11 
 _atom_site_aniso_U_22 
 _atom_site_aniso_U_33 
 _atom_site_aniso_U_23 
 _atom_site_aniso_U_13 
 _atom_site_aniso_U_12 
O1 0.0793(9) 0.0674(8) 0.0707(8) -0.0406(7) -0.0208(7) 0.0075(6) 
O2 0.0739(8) 0.0535(7) 0.0549(7) -0.0210(6) -0.0164(6) -0.0028(6) 
O3 0.0462(8) 0.1292(11) 0.0857(10) -0.0722(9) -0.0145(7) 0.0037(7) 
O4 0.0474(8) 0.1219(11) 0.0854(10) -0.0681(9) -0.0116(7) 0.0009(7) 
N1 0.0468(7) 0.0414(6) 0.0335(7) -0.0186(5) -0.0030(6) -0.0055(5) 
N2 0.0438(7) 0.0495(7) 0.0336(7) -0.0191(6) -0.0057(6) -0.0050(5) 
N3 0.0418(7) 0.0626(8) 0.0496(8) -0.0364(6) -0.0123(6) 0.0046(6) 
C1 0.0390(8) 0.0395(7) 0.0337(8) -0.0175(6) -0.0067(6) -0.0002(6) 
C2 0.0441(9) 0.0491(8) 0.0381(8) -0.0230(6) -0.0135(7) 0.0001(6) 
C3 0.0387(8) 0.0467(8) 0.0414(8) -0.0216(7) -0.0099(7) -0.0037(6) 
C4 0.0418(8) 0.0425(7) 0.0317(8) -0.0162(6) -0.0071(7) -0.0009(6) 
C5 0.0476(9) 0.0536(8) 0.0400(9) -0.0234(7) -0.0130(7) -0.0053(6) 
C6 0.0405(9) 0.0518(8) 0.0408(9) -0.0217(7) -0.0085(7) -0.0092(6) 
C7 0.0482(10) 0.0665(11) 0.0490(10) -0.0337(8) -0.0162(8) 0.0029(7) 
C8 0.0462(10) 0.0948(14) 0.0423(10) -0.0375(9) -0.0063(8) 0.0010(9) 
C9 0.0528(10) 0.0774(12) 0.0357(9) -0.0151(8) -0.0045(8) -0.0123(8) 
C10 0.0455(9) 0.0585(9) 0.0386(9) -0.0182(7) -0.0118(7) -0.0061(7) 
C11 0.0386(8) 0.0404(7) 0.0372(8) -0.0201(6) -0.0074(6) 0.0033(6) 
C12 0.0516(9) 0.0421(8) 0.0345(8) -0.0162(6) -0.0094(7) 0.0022(6) 
C13 0.0511(9) 0.0402(8) 0.0455(9) -0.0208(7) -0.0100(7) 0.0007(6) 
C14 0.0407(8) 0.0512(9) 0.0429(9) -0.0268(7) -0.0113(7) 0.0053(6) 
C15 0.0596(10) 0.0537(9) 0.0369(8) -0.0200(7) -0.0165(8) 0.0066(7) 
C16 0.0583(10) 0.0392(7) 0.0398(9) -0.0155(6) -0.0151(7) 0.0052(6) 
C17 0.0469(10) 0.0681(10) 0.0540(10) -0.0365(8) -0.0162(8) 0.0090(7) 
C18 0.0601(11) 0.0706(11) 0.0557(10) -0.0424(9) -0.0214(9) 0.0131(8) 
C19 0.0600(12) 0.0642(10) 0.0629(11) -0.0389(9) -0.0256(9) 0.0058(8) 
C20 0.0466(10) 0.0621(10) 0.0525(10) -0.0305(8) -0.0143(8) 0.0032(7) 
C21 0.0434(9) 0.0426(7) 0.0361(8) -0.0160(6) -0.0120(7) -0.0022(6) 
C22 0.0514(9) 0.0480(8) 0.0473(9) -0.0247(7) -0.0156(7) 0.0014(6) 
C23 0.0809(13) 0.0451(9) 0.0610(11) -0.0263(8) -0.0300(10) 0.0038(8) 
C24 0.0906(14) 0.0447(9) 0.0609(11) -0.0093(8) -0.0317(11) -0.0173(9) 
C25 0.0547(11) 0.0630(11) 0.0569(11) -0.0097(8) -0.0103(9) -0.0158(8) 
C26 0.0477(10) 0.0515(9) 0.0532(10) -0.0163(7) -0.0108(8) -0.0007(7) 
 
_geom_special_details 
; 
 All esds (except the esd in the dihedral angle between two l.s. planes) 
 are estimated using the full covariance matrix.  The cell esds are taken 
 into account individually in the estimation of esds in distances, angles 
 and torsion angles; correlations between esds in cell parameters are only 
 used when they are defined by crystal symmetry.  An approximate (isotropic) 
 treatment of cell esds is used for estimating esds involving l.s. planes. 
; 
 
loop_ 
 _geom_bond_atom_site_label_1 
 _geom_bond_atom_site_label_2 
 _geom_bond_distance 
 _geom_bond_site_symmetry_2 
 _geom_bond_publ_flag 
O1 C7 1.2079(18) . ? 
O2 C10 1.2064(17) . ? 
O3 C17 1.2024(18) . ? 
O4 C20 1.2029(18) . ? 
N1 C11 1.4190(16) . ? 
N1 C1 1.4269(16) . ? 
N1 C21 1.4327(16) . ? 
N2 C7 1.3902(18) . ? 
N2 C10 1.3928(18) . ? 
N2 C4 1.4323(16) . ? 
N3 C17 1.3922(18) . ? 
N3 C20 1.396(2) . ? 
N3 C14 1.4351(17) . ? 
C1 C2 1.3856(18) . ? 
C1 C6 1.3884(19) . ? 
C2 C3 1.3793(19) . ? 
C3 C4 1.3755(19) . ? 
C4 C5 1.3817(19) . ? 
C5 C6 1.3808(19) . ? 
C7 C8 1.481(2) . ? 
C8 C9 1.312(2) . ? 
C9 C10 1.475(2) . ? 
C11 C16 1.3897(19) . ? 
C11 C12 1.3925(18) . ? 
C12 C13 1.3826(19) . ? 
C13 C14 1.377(2) . ? 
C14 C15 1.3767(19) . ? 
C15 C16 1.3764(19) . ? 
C17 C18 1.477(2) . ? 
C18 C19 1.305(2) . ? 
C19 C20 1.477(2) . ? 
C21 C26 1.379(2) . ? 
C21 C22 1.3886(19) . ? 
C22 C23 1.376(2) . ? 
C23 C24 1.371(2) . ? 
C24 C25 1.377(3) . ? 
C25 C26 1.386(2) . ? 
 
loop_ 
 _geom_angle_atom_site_label_1 
 _geom_angle_atom_site_label_2 
 _geom_angle_atom_site_label_3 
 _geom_angle 
 _geom_angle_site_symmetry_1 
 _geom_angle_site_symmetry_3 
 _geom_angle_publ_flag 
C11 N1 C1 120.26(10) . . ? 
C11 N1 C21 119.68(10) . . ? 
C1 N1 C21 118.20(10) . . ? 
C7 N2 C10 110.14(12) . . ? 
C7 N2 C4 125.48(11) . . ? 
C10 N2 C4 124.33(11) . . ? 
C17 N3 C20 109.11(12) . . ? 
C17 N3 C14 126.53(12) . . ? 
C20 N3 C14 124.25(12) . . ? 
C2 C1 C6 118.70(12) . . ? 
C2 C1 N1 121.75(12) . . ? 
C6 C1 N1 119.53(12) . . ? 
C3 C2 C1 120.77(13) . . ? 
C4 C3 C2 120.00(13) . . ? 
C3 C4 C5 120.05(12) . . ? 
C3 C4 N2 119.72(12) . . ? 
C5 C4 N2 120.23(12) . . ? 
C6 C5 C4 119.87(13) . . ? 
C5 C6 C1 120.61(13) . . ? 
O1 C7 N2 125.49(14) . . ? 
O1 C7 C8 128.69(15) . . ? 
N2 C7 C8 105.82(14) . . ? 
C9 C8 C7 108.87(14) . . ? 
C8 C9 C10 109.42(14) . . ? 
O2 C10 N2 125.68(14) . . ? 
O2 C10 C9 128.63(15) . . ? 
N2 C10 C9 105.69(13) . . ? 
C16 C11 C12 118.11(12) . . ? 
C16 C11 N1 121.37(11) . . ? 
C12 C11 N1 120.52(12) . . ? 
C13 C12 C11 120.39(13) . . ? 
C14 C13 C12 120.44(13) . . ? 
C15 C14 C13 119.70(12) . . ? 
C15 C14 N3 119.96(13) . . ? 
C13 C14 N3 120.31(12) . . ? 
C16 C15 C14 120.05(14) . . ? 
C15 C16 C11 121.18(12) . . ? 
O3 C17 N3 125.09(14) . . ? 
O3 C17 C18 128.63(14) . . ? 
N3 C17 C18 106.27(13) . . ? 
C19 C18 C17 109.31(13) . . ? 
C18 C19 C20 108.89(14) . . ? 
O4 C20 N3 124.67(14) . . ? 
O4 C20 C19 128.91(16) . . ? 
N3 C20 C19 106.42(13) . . ? 
C26 C21 C22 119.04(13) . . ? 
C26 C21 N1 120.26(12) . . ? 
C22 C21 N1 120.70(13) . . ? 
C23 C22 C21 120.23(15) . . ? 
C24 C23 C22 120.59(15) . . ? 
C23 C24 C25 119.65(14) . . ? 
C24 C25 C26 120.13(16) . . ? 
C21 C26 C25 120.34(15) . . ? 
 
_diffrn_measured_fraction_theta_max    0.995 
_diffrn_reflns_theta_full              27.44 
_diffrn_measured_fraction_theta_full   0.995 
_refine_diff_density_max    0.230 
_refine_diff_density_min   -0.240 
_refine_diff_density_rms    0.062 
